# Supplementary material
Source: publisher site journal article supplement (https://www.dovepress.com/article/549106)
Supplement: Supplementary file 1 [file 549106%20Revised%20supplementary.docx]

# **Supplementary Data**

**Supplementary Table 1** Overview of Assessment Scales Used to Assess Treatment Effectiveness

| **Instrument** | **Overview** | **Scoring** |
| --- | --- | --- |
| Montgomery–Åsberg Depression Rating Scale (MADRS) 1 | - Physician-rated - Assesses depressive symptom severity and change with antidepressant treatment - 10 items: apparent sadness, reported sadness, inner tension, reduced sleep, reduced appetite, concentration difficulties, lassitude, inability to feel, pessimistic thoughts and suicidal thoughts | - Item score: 0 (absent) to 6 (severe) - Total score: 0 to 60 - Higher scores indicate greater severity of core depressive symptoms |
| Clinical Global Impression–Severity (CGI-S) and CGI–Improvement (CGI-I) 2,3 | - Physician-rated - Brief tools for assessment of severity of illness (CGI-S), and global improvement on treatment (CGI-I) | - CGI-S score: 1 (normal, not at all ill) to 7 (among the most extremely ill patients) - CGI-I score: 1 (very much improved) to 7 (very much worse) |
| Digit Symbol Substitution Test (DSST) 4 | - Patients substitute simple symbols for numbers - Evaluates psychomotor speed of performance requiring visual perception, spatial decision-making, and motor skills - Sensitive to cognitive impairments affecting attention, processing speed, and executive function (including working memory) | - Score is the number of correct symbols substituted during a 90-second period - Total score: 0 to 133 - Higher scores indicate better cognitive performance |
| Rey Auditory Verbal Learning Test (RAVLT) 5 | - Memory test assessing word learning and recall - Uses two different lists, each of 15 nouns - List A is read to the patient, who is immediately asked to recall as many words as possible; this is repeated five times (Trials I to V) - List B (or the interference list) is then read to the patient, who is immediately asked to recall as many words as possible from this list - Short recall is then evaluated by assessing how many words the patient is able to remember from List A (Trial VI) - After a 20-minute break, delayed recall is tested by reassessing how many words the patient is able to remember from List A (Trial VII) - Recognition may be assessed by presenting the patient with words from both lists mixed with other words and asking them to identify those they recognize from Lists A and B | - Each trial is scored based on the number of words correctly recalled (maximum, 15 per trial) - RAVLT total score is the sum of the scores for Trials I to V (maximum, 75) - Higher scores indicate better cognitive performance |

| **Instrument** | **Overview** | **Scoring** |
| --- | --- | --- |
| Instrumental Activities of Daily Living (IADL) 6 | - Physician-rated - Assesses ability to perform eight activities important for independent living: telephone use, shopping, meal preparation, housekeeping, doing the laundry, mode of transportation, managing medication, and managing personal finances | - Item score: 1 (independent) to 3–5 (maximum score indicates the level of assistance required and is item-dependent) - IADL polytomous score: 8 to 31 - Higher scores indicate greater functional impairment |
| Bath Assessment of Subjective Quality of Life in Dementia (BASQID) 7 | - Physician-rated - Assesses 14 items over two subscales: life satisfaction (8 items) and feelings of positive quality of life (6 items) | - Raw scores summed and converted to a percentage score - Additional questions: 0 (very poor) to 4 (very good) - Higher scores indicate better quality of life |

**References**

1. Montgomery SA, Åsberg M. A new depression scale designed to be sensitive to change. *Br J Psychiatry.* 1979;134:382–389 . doi:10.1192/bjp.134.4.382

2. Guy W. *ECDEU assessment manual for psychopharmacology.* US Department of Health, Education, and Welfare, Public Health Service, Alcohol, Drug Abuse, and Mental Health Administration; 1976.

3. Busner J, Targum SD. The clinical global impressions scale: applying a research tool in clinical practice. *Psychiatry (Edgmont).* 2007;4(7):28–37.

4. Wechsler D. *Manual for the Wechsler Adult Intelligence Scale—Revised.* New York: Psychological Corporation; 1981.

5.  Bean J. Rey auditory verbal learning test. In: Kreutzer JS, DeLuca J, Caplan B, editors. *Encyclopedia of Clinical Neuropsychology.* New York: Springer; 2011.

6. Lawton MP, Brody EM. Assessment of older people: self-maintaining and instrumental activities of daily living. *Gerontologist*. 1969;9(3):179–186.

7. Trigg R, Skevington SM, Jones RW. How can we best assess the quality of life of people with dementia? The Bath Assessment of Subjective Quality of Life in Dementia (BASQID). *Gerontologist*. 2007;47(6):789–797. doi:10.1093/geront/47.6.789.

**Supplementary Table 2** Summary of Treatment-Emergent Adverse Events in Patients with MDD and Early-Stage Dementia in the Overall Study Population and the Four Patient Subgroups (All Treated Patients)

| **TEAEs Occurring in More Than One Patient in Any Subgroup** | **Overall Population (n = 82)** | **Alzheimer’s Disease (n = 35)** | **Mixed-Type Dementia (n = 22)** | **Concomitant Drug(s) for Dementia (n = 34)** | **MADRS Total Score ≥30 (n = 42)** |
| --- | --- | --- | --- | --- | --- |
| Abdominal pain | 9 (11) | 4 (11) | 1 (5) | 6 (18) | 3 (7) |
| Nausea | 9 (11) | 2 (6) | 4 (18) | 2 (6) | 8 (19) |
| Headache | 6 (7) | 2 (6) | 3 (14) | 3 (9) | 4 (10) |
| Diarrhea | 3 (4) | 0 | 3 (14) | 2 (6) | 3 (7) |
| Dizziness | 3 (4) | 1 (3) | 2 (9) | 1 (3) | 2 (5) |

**Notes:** Data shown are n (%).
**Abbreviations:** MDD, major depressive disorder; TEAEs, treatment-emergent adverse events.
